# Supplementary material for: Identification of Nordic Berries with Beneficial Effects on Cognitive Outcomes and Gut Microbiota in High-Fat-Fed Middle-Aged C57BL/6J Mice
Source: MDPI journal article supplement (doi:10.3390/nu14132734), 2022-06-30
Supplement: s1 [file s1]

Supplementary Materials

# Identification of Nordic Berries with Beneficial Effects on Cognitive Outcomes and Gut Microbiota in High-Fat-Fed Middle-Aged C57BL/6J Mice

Fang Huang <sup>1,2,\*</sup>, Nittaya Marungruang <sup>3,†</sup>, Olha Kostiuchenko <sup>4,5</sup>, Nadiia Kravchenko <sup>4,5</sup>, Stephen Burleigh <sup>4</sup>, Olena Prykhodko <sup>4</sup>, Frida Fåk Hällenius <sup>4</sup> and Lovisa Heyman-Lindén <sup>3,6</sup>

**Table S1.** Composition of diets. All diets were designed to have an equal caloric content of fat, protein, and carbohydrates (including glucose, fructose, and sucrose).

|                                                 | LF     | HF     | Lingonberries | Bilberries | Blackcurrants | Cloudberries | Seabuckthorn | Blueberries |
|-------------------------------------------------|--------|--------|---------------|------------|---------------|--------------|--------------|-------------|
| <i>Calculated energy(kcal)</i>                  |        |        |               |            |               |              |              |             |
| Protein                                         | 708.0  | 708.0  | 708.0         | 708.0      | 708.0         | 708.0        | 708.0        | 708.0       |
| Carbohydrate                                    | 2840.0 | 815.2  | 815.2         | 815.2      | 815.2         | 815.2        | 815.2        | 815.2       |
| Sucrose                                         | 195.2  | 195.2  | 195.2         | 195.2      | 195.2         | 195.2        | 195.2        | 195.2       |
| Fructose                                        | 64.0   | 64.0   | 64.0          | 64.0       | 64.0          | 64.0         | 64.0         | 64.0        |
| Glucose                                         | 64.0   | 64.0   | 64.0          | 64.0       | 64.0          | 64.0         | 64.0         | 64.0        |
| Fat                                             | 405.0  | 2430.0 | 2430.0        | 2430.0     | 2430.0        | 2430.0       | 2430.0       | 2430.0      |
| Fiber                                           | 0.0    | 0.0    | 0.0           | 0.0        | 0.0           | 0.0          | 0.0          | 0.0         |
| Other                                           | 0.0    | 0.0    | 0.0           | 0.0        | 0.0           | 0.0          | 0.0          | 0.0         |
| Total kcals                                     | 3953   | 3953   | 3953          | 3953       | 3953          | 3953         | 3953         | 3953        |
| <i>Calculated energy per gram diet (kcal/g)</i> |        |        |               |            |               |              |              |             |
| kcal/g                                          | 3.7    | 5.1    | 5.1           | 5.1        | 5.1           | 5.1          | 5.1          | 5.1         |
| <i>Calculated energy (kcal%)</i>                |        |        |               |            |               |              |              |             |
| Protein                                         | 18     | 18     | 18            | 18         | 18            | 18           | 18           | 18          |
| Carbohydrate                                    | 72     | 21     | 21            | 21         | 21            | 21           | 21           | 21          |
| Fat                                             | 10     | 61     | 61            | 61         | 61            | 61           | 61           | 61          |
| Fiber                                           | 0      | 0      | 0             | 0          | 0             | 0            | 0            | 0           |
| <i>Fiber content (g/100 g diet)</i>             |        |        |               |            |               |              |              |             |
| Total fiber <sup>1</sup>                        | 4.7    | 6.5    | 6.1           | 6.4        | 6.6           | 7.0          | 6.1          | 6.5         |

<sup>1</sup> Fiber coming from added cellulose (LF and HF diets) or added cellulose plus fibers present in berries (berry diets) added to HF diet at 6% (w/w) dry weight basis.

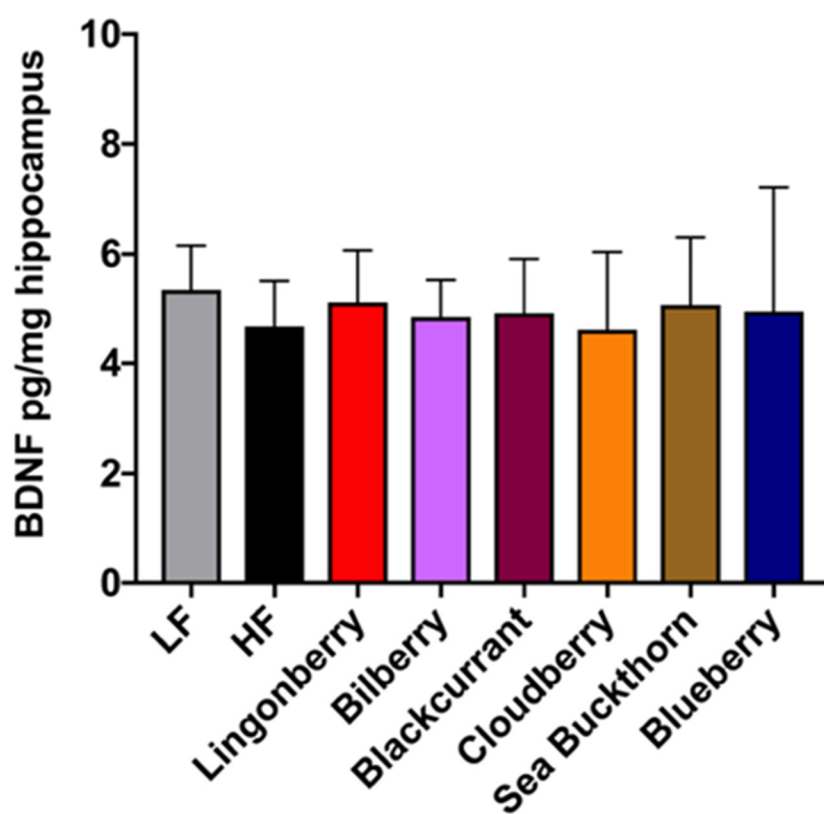

**Figure S1.** BDNF (pg/mg) level in hippocampus. The brain homogenates were made on different weights of hippocampus.

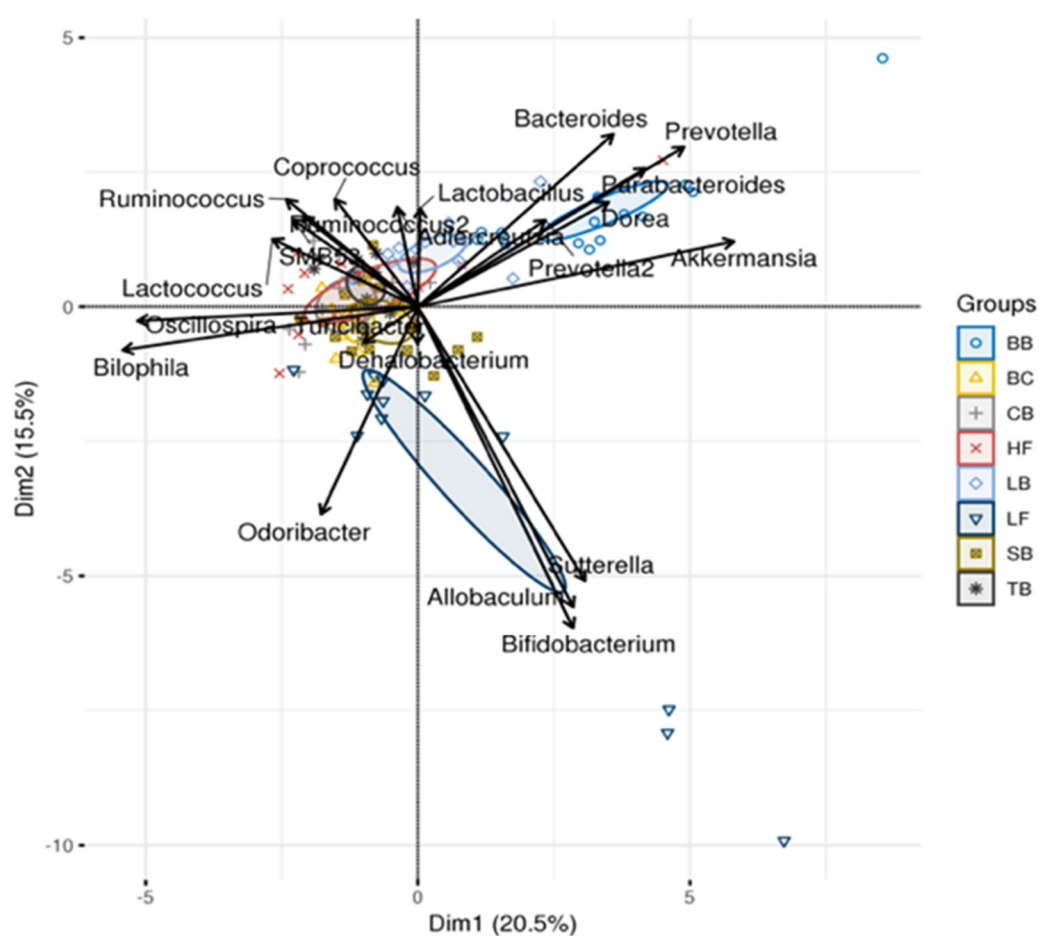

**Figure S2.** Principal component analysis (PCA) plot of the gut microbiota at genus level in mice fed LF, HF, lingonberry, bil-berry, blackcurrant, cloudberry, sea buckthorn and blueberry.
